# Supplementary material for: A physical map of human Alu repeats cleavage by restriction endonucleases
Source: Springer Nature journal article supplement (doi:10.1186/1471-2164-9-305), 2008-01-01

# AluI

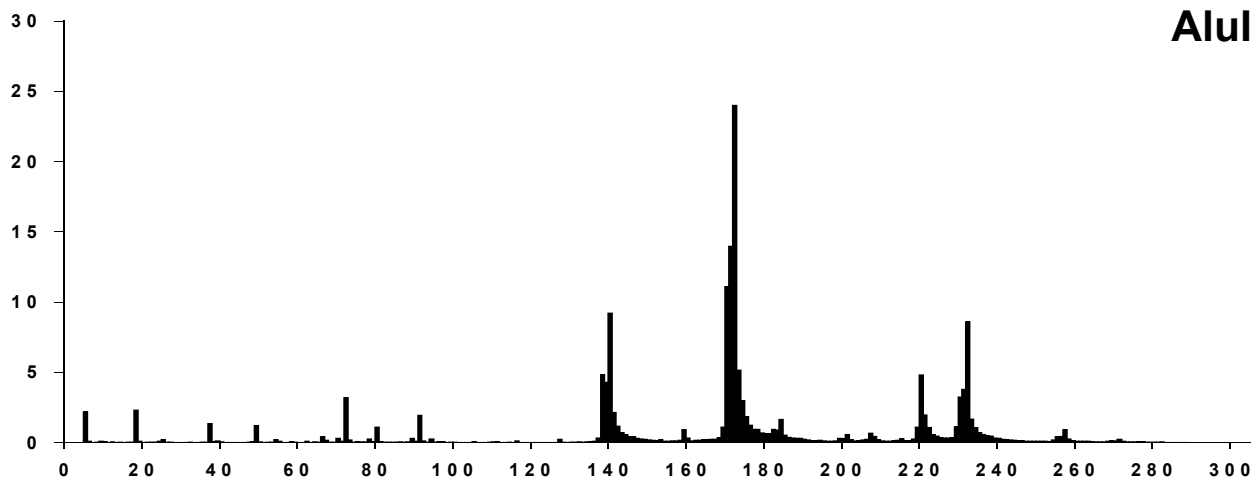

# AsuHPI

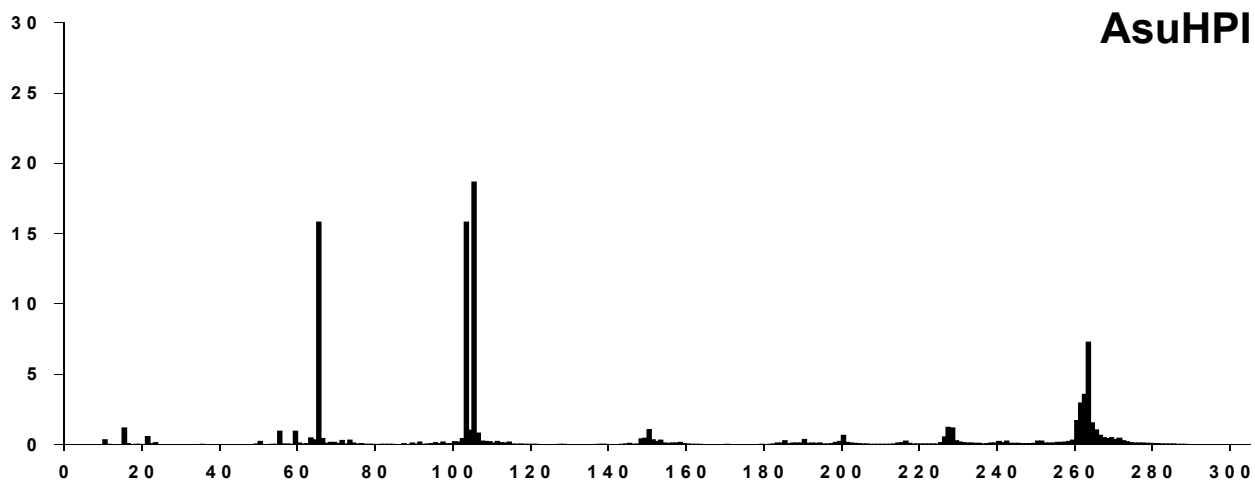

# Bpu10I

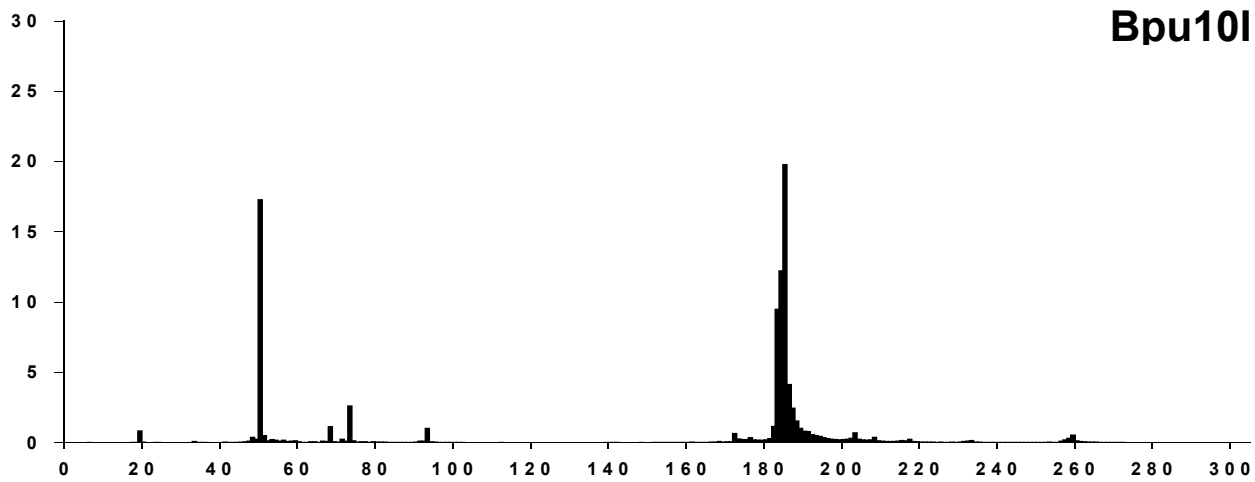

# BssECI

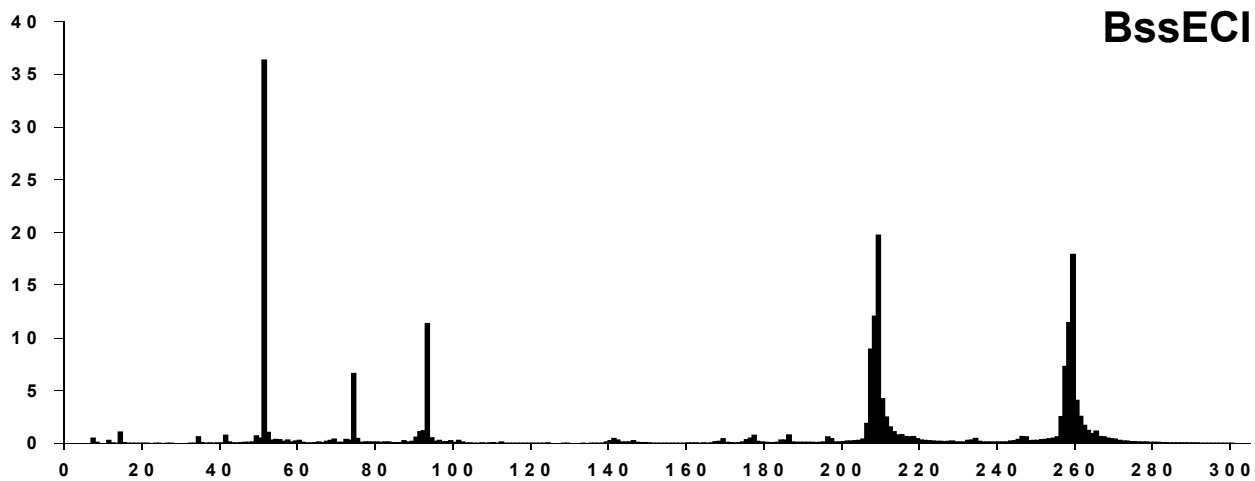

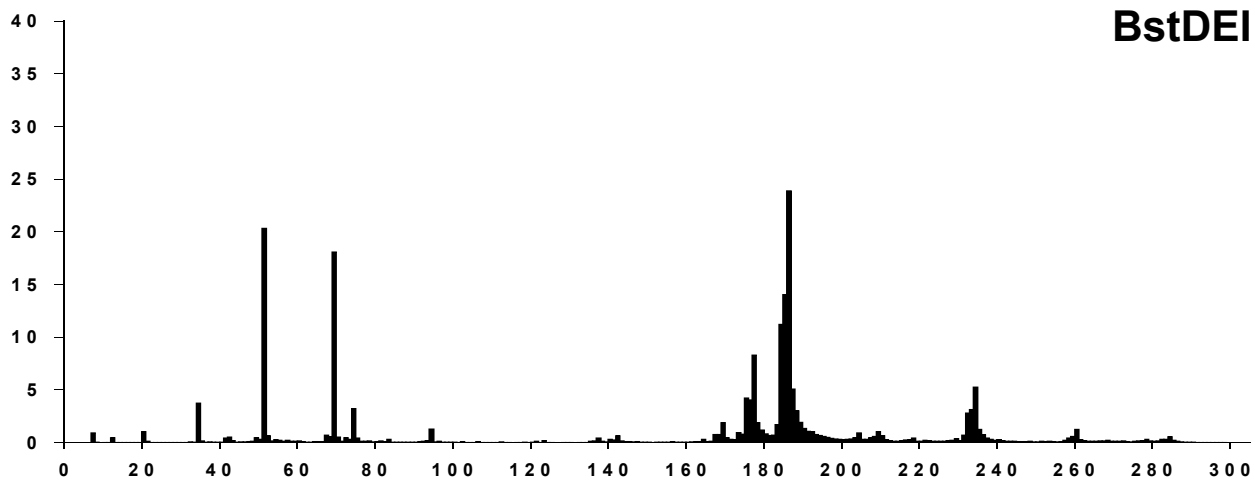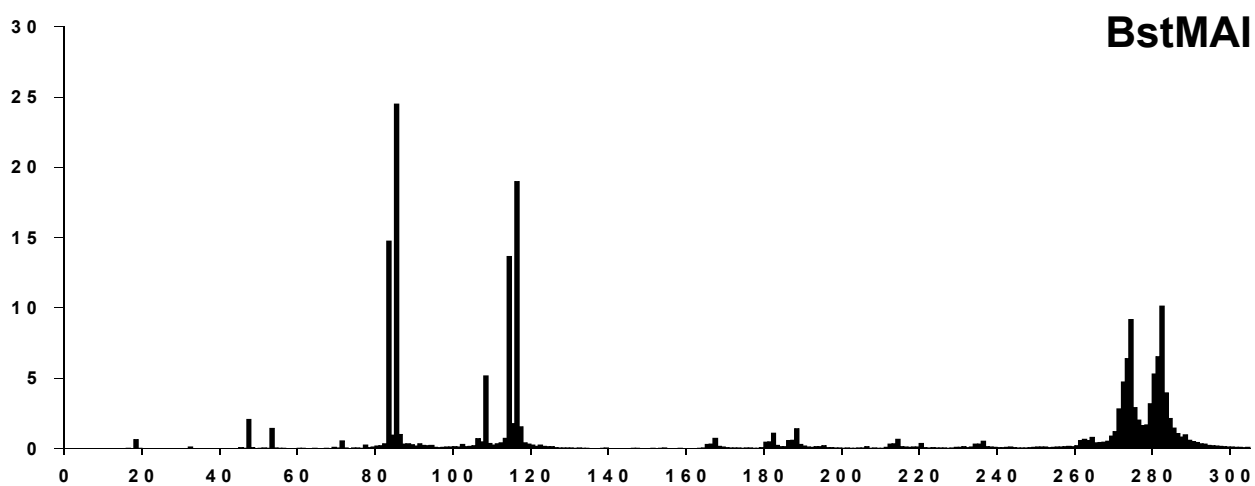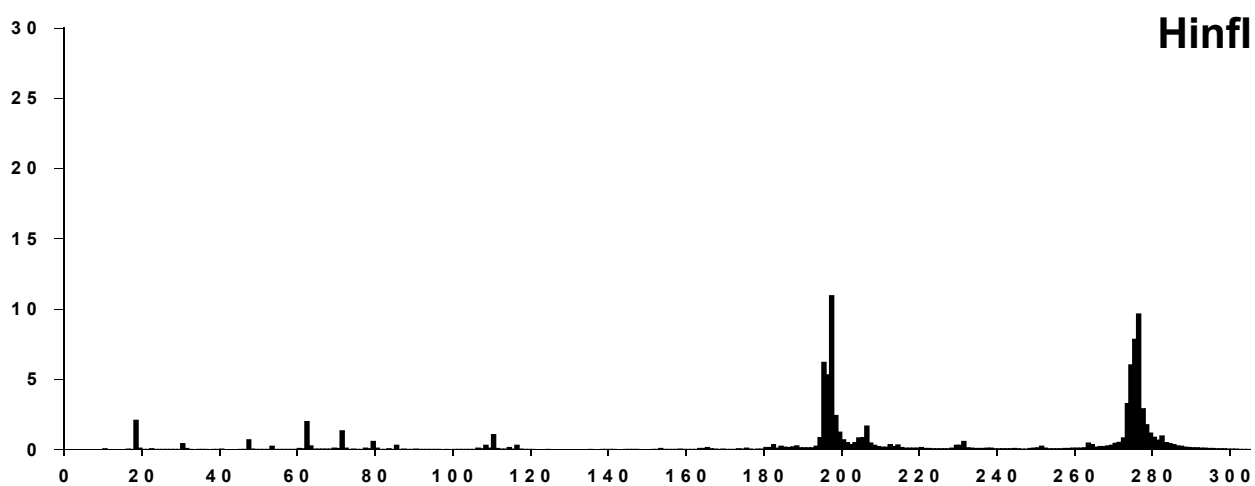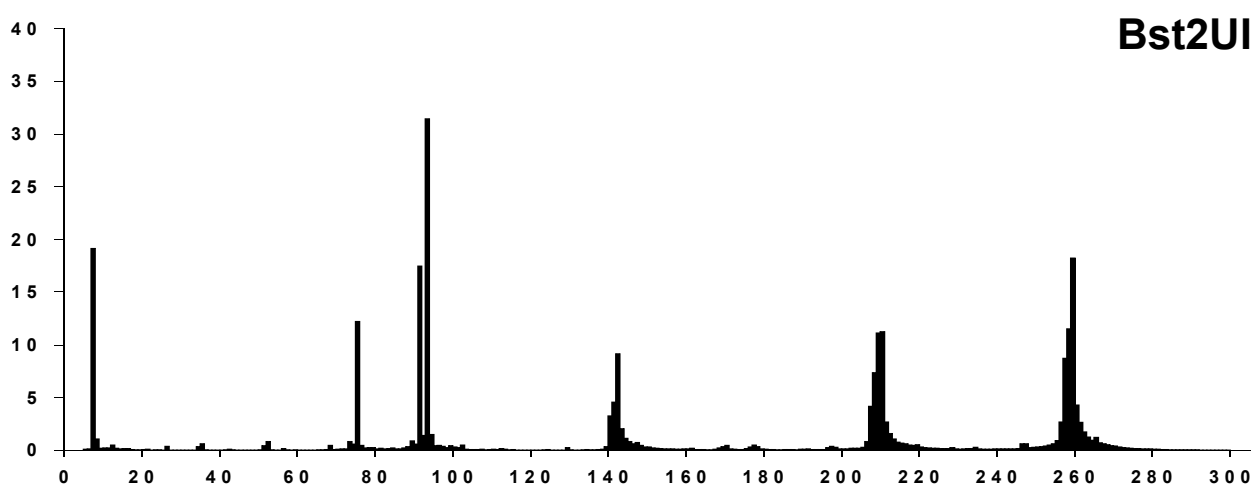

# BstSCI

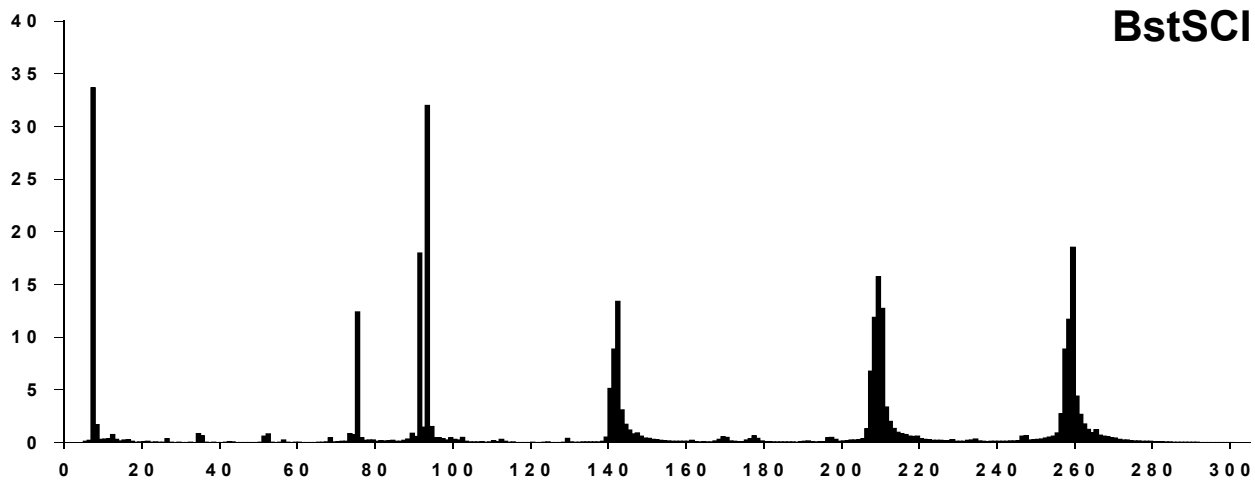

Supplement: Additional file 1 [file 1471-2164-9-305-s1.pdf]
